# Supplementary material for: Landscape configuration in seagrass meadows and its influence on carbon stock in reef lagoon systems
Source: Frontiers journal article supplement (doi:10.3389/fmars.2024.1320194), 2025-03-19
Supplement: Table_1.docx [file Table_1.docx]

Supplementary Table 1. Structural characteristics of seagrass landscapes identified. LD-R: Low density over rocks; MD-SR: Medium density over sand-rock; and HD-S: High density over sand. n: Standing crop and Below-ground biomass samples.

| **Estructure variable** | **LD-R** | | | | **MD-SR** | | | | **HD-S** | | | |
| --- | --- | --- | --- | --- | --- | --- | --- | --- | --- | --- | --- | --- |
| **n** | **average** | **median** | **range**  **(min-max)** | **n** | **average** | **median** | **range**  **(min-max)** | **n** | **average** | **median** | **range**  **(min-max)** |
| **Northern** | | | | | | | | | | | | |
| Benthic coverage (%) | 15 | 29.4 | 15 | 10 - 40 | 57 | 53.7 | 55 | 20 - 90 | 20 | 79.3 | 70 | 40 - 90 |
| Canopy height (cm) | 7 | 17.0 | 17.8 | 11.2 - 24.4 | 38 | 16.8 | 15.9 | 6.3 – 32.0 | 20 | 17.0 | 14.9 | 9.9 - 25.8 |
| Density (shoot m2) | 7 | 572.8 | 613.6 | 264.6 - 848.8 | 38 | 994.0 | 864.1 | 452.7 - 1991.9 | 20 | 1140.1 | 1097.5 | 719.2 - 1754.2 |
| Standing crop (g/m2) | 7 | 131.9 | 152.8 | 53.8 - 198.1 | 38 | 183.9 | 168.4 | 35.1 - 534.4 | 20 | 203.1 | 195.0 | 104.7 - 386.7 |
| Below-ground (g/m2) | 7 | 645.1 | 401.8 | 168.1 - 1378.4 | 38 | 873.9 | 775.3 | 90.5 - 2025.9 | 20 | 1115.1 | 921.5 | 405.9 - 2337.1 |
| Leaf area index (m2) | 7 | 3.4 | 2.9 | 1.7 - 5.4 | 38 | 4.7 | 4.1 | 0.4 - 18.5 | 20 | 5.2 | 5.4 | 2. - 8.7 |
| **Southern** | | | | | | | | | | | | |
| Benthic coverage (%) | 85 | 41.6 | 35 | 10 - 50 | 95 | 53.2 | 55 | 40 - 90 | 63 | 73.1 | 65 | 35 - 90 |
| Canopy height (cm) | 25 | 11.9 | 11.4 | 5.5 - 22.1 | 36 | 15.0 | 14.5 | 5.5 - 33.0 | 26 | 17.7 | 17.7 | 6.5 - 30.4 |
| Density (shoot m2) | 25 | 668.5 | 679.1 | 346.6 - 905.4 | 36 | 902.6 | 951.4 | 282.9 - 1499.6 | 26 | 952.9 | 1004.4 | 169.8 - 1612.8 |
| Standing crop (g/m2) | 25 | 103.2 | 84.9 | 10.2 - 248.9 | 36 | 112.1 | 116.3 | 12.1 - 148.9 | 26 | 144.9 | 138.6 | 44.4 - 401.8 |
| Below-ground (g/m2) | 25 | 434.5 | 276.1 | 62.4 - 1641.1 | 36 | 521.2 | 530.5 | 39.5 - 1255.6 | 26 | 620.3 | 670.4 | 74.2 - 1675.0 |
| Leaf area index (m2) | 25 | 2.9 | 3.0 | 0.4 - 7.8 | 36 | 3.8 | 3.1 | 0.3 - 14.8 | 26 | 5.0 | 4.3 | 0.6 - 13.3 |
