# Supplementary material for: Landscape configuration in seagrass meadows and its influence on carbon stock in reef lagoon systems
Source: Frontiers journal article supplement (doi:10.3389/fmars.2024.1320194), 2025-03-19
Supplement: Table_2.xlsx [file Table_2.xlsx]

## Sheet: hoja 1
Suplementary Table 2. Environmental characteristics calculated for each landscape defined in the ten reef lagoons. LD-R: Low density over rocks; MD-SR: Medium density over sand-rock; HD-S: High density over sand.
System	Variable	North Region
		LDR Landscape				MD-SR Landscape				HD-S Landscape
		n	Average	Min value	Max value	n	Average	Min value	Max value	n	Average	Min value	Max value
Gallega	Windward length (km)	0.73413
Gallega	Water depth (m)	-	-	-	-	13	0.73	0.4	1.2	4	0.73	0.6	0.8
Gallega	Light incidence (%)	-	-	-	-	6	17.08	16.46	17.5	4	16.98	16.28	17.5
Galleguilla	Windward length (km)	1.8042
Galleguilla	Water depth (m)	4	0.78	0.6	1.1	3	0.87	0.7	1	6	0.83	0.8	0.9
Galleguilla	Light incidence (%)	3	40.51	25.59	50.28	3	44.44	43.22	45.12	5	46.17	39.61	55.2
I. Pajaros	Windward length (km)	2.81987
I. Pajaros	Water depth (m)	-	-	-	-	13	1.05	0.5	1.6	3	0.53	0.5	0.6
I. Pajaros	Light incidence (%)	-	-	-	-	6	44.09	41.07	52.13	3	46.36	43.41	49.22
I. Sacrificios	Windward length (km)	1.67001
I. Sacrificios	Water depth (m)	-	-	-	-	12	0.75	0.4	1.5	4	0.55	0.5	0.6
I. Sacrificios	Light incidence (%)	-	-	-	-	6	43.47	42.01	46.06	4	40.13	36.75	42.13
I. Verde	Windward length (km)	2.22558
I. Verde	Water depth (m)	4	0.7	0.5	0.9	4	0.63	0.5	0.8	4	0.55	0.5	0.6
I. Verde	Light incidence (%)	4	41.54	40.15	43.55	5	44.79	40.54	47.18	4	53.33	50.06	55.55
System	Variable	South Region
		LDR Landscape				MD-SR Landscape				HD-S Landscape
		n	Average	Min value	Max value	n	Average	Min value	Max value	n	Average	Min value	Max value
A. Afuera	Windward length (km)	6.37787
A. Afuera	Water depth (m)	2	1.5	1.5	1.5	13	1.28	0.8	2	10	1.25	1	2
A. Afuera	Light incidence (%)	2	50.88	50.51	51.25	9	41.44	25.96	46.11	6	46.24	42.37	54.43
Cabezo	Windward length (km)	8.41238
Cabezo	Water depth (m)	12	1.83	1.3	2.5	15	1.29	0.7	2	21	1.35	0.7	1.8
Cabezo	Light incidence (%)	6	42.06	34.1	50.31	12	45.74	34.1	53.84	13	43.58	30.63	50.11
Chopas	Windward length (km)	4.67032
Chopas	Water depth (m)	15	1.27	0.9	2.1	11	0.88	0.5	1.2	8	1.08	0.5	1.5
Chopas	Light incidence (%)	6	25.06	19	34.04	2	22.48	18	29.42	4	22.13	19	28.11
En medio	Windward length (km)	5.38155
En medio	Water depth (m)	9	0.86	0.5	1.5	6	1.35	0.7	2	11	1.2	0.7	1.7
En medio	Light incidence (%)	7	47.06	41.78	51.16	3	46.11	43.09	47.85	8	46.48	43.13	49.66
Rizo	Windward length (km)	4.50586
Rizo	Water depth (m)	5	1.72	1.3	1.9	8	1.56	1.3	1.9	2	1.7	1.7	1.7
Rizo	Light incidence (%)	5	27.4	25	30.9	8	28.69	25.2	30.7	2	28.2	25.6	30.8
