# Supplementary material for: Landscape configuration in seagrass meadows and its influence on carbon stock in reef lagoon systems
Source: Frontiers journal article supplement (doi:10.3389/fmars.2024.1320194), 2025-03-19
Supplement: Table_3.xlsx [file Table_3.xlsx]

## Sheet: Hoja3
Suplementary Table 3. Landscape metrics calculated and geomorphological characteristics for each landscape defined in the ten reef lagoons. LD-R: Low density over rocks; MD-SR: Medium density over sand-rock; HD-S: High density over sand; UV: Unvegetated. TLA: Total landscapes area; CA: Class area; ZLAND: Landscape proportion; NumP: Number of patches; MPS: Mean Patch Size; PD: Patch Density; LPI: …
Location				Geomorphological variables and landscape metrics
Region	System	Landscape	Windward distance to landscape (m)	TLA (ha)	CA (ha)	ZLAND (%)	NumP (#)	MPS (m2)	PD (#/100 ha)	LPI (%)	ED (m/ha)	LSI	AWMPFD	AI (%)	PLADJ (%)	COHESION	SPLIT	DIVISION (%)
			mean (SE)
North	Gallega	MD-SR	205,3 (48,3)	64.9	22.2	44.4	229	970	0.103	24.2878	1077.77	28.552	1.46	88.2343	87.8591	99.4683	12.8356	0.9221
	Gallega	HD-S	267,9 (105,8)		5.2	10.4	227	230	0.441	3.8483	391.48	21.4079	1.35	81.8299	81.1078	96.7539	531.633	0.9981
	Gallega	UV	-		37.6	34.1
	Galleguilla	LD-R	204,8 (39,9)	59.8	8.1	23.7	58	1400	0.072	11.7131	509.42	15.2772	1.39	89.8804	89.2478	98.9834	46.3934	0.9784
	Galleguilla	MD-SR	178,7 (49,1)		5	14.7	90	560	0.179	5.5275	467.04	17.7378	1.35	84.8822	84.1224	97.3781	260.32	0.9962
	Galleguilla	HD-S	199,2 (34,1)		2.9	8.3	64	450	0.224	1.686	268.23	13.574	1.28	84.8701	83.861	95.1086	1468.12	0.9993
	Galleguilla	UV	-		43.8	73.3
	I. Pajaros	MD-SR	216,8 (22,6)	112.2	43.7	39	549	800	0.125	34.9637	386.32	16.3686	1.36	95.3307	95.0419	99.6894	8.1765	0.8777
	I. Pajaros	HD-S	326,3 (71,2)		2.2	2	52	430	0.233	0.4939	50.38	9.38	1.2	88.5289	87.3335	94.6907	20219.5	1
	I. Pajaros	UV	-		66.7	59
	I. Sacrificios	MD-SR	224,7 (30)	41	17.9	43.7	130	1380	0.072	30.7375	678.18	16.4009	1.37	92.6786	92.2401	99.4727	10.0206	0.9002
	I. Sacrificios	HD-S	146,2 (30)		4.1	9.9	74	550	0.182	1.969	235.81	11.9703	1.26	88.9751	88.0898	96.5495	830.833	0.9988
	I. Sacrificios	UV	-		19	46.4
	I. Verde	LD-R	202,2 (31,2)	105.5	16.6	27.1	119	1400	0.072	16.1429	421.86	15.8554	1.32	92.681	92.2266	98.8452	35.3254	0.9717
	I. Verde	MD-SR	237 (45,2)		19	30.9	209	910	0.11	19.5875	729.74	25.6972	1.4	88.5819	88.1742	99.1044	25.5205	0.9608
	I. Verde	HD-S	258,6 (50,6)		1.7	2.7	29	580	0.172	1.2803	68.59	8.1154	1.25	88.815	87.4405	95.998	4967.57	0.9998
	I. Verde	UV	-		68.2	64.7
South	A. Afuera	LD-R	581,6 (189)	447.3	157.9	35.3	1279	1230	0.081	10.3861	721.47	64.1941	1.41	89.9218	89.7786	99.3215	67.8134	0.9853
	A. Afuera	MD-SR	401,2 (56,6)		141.3	31.6	857	1650	0.061	22.2351	599.51	56.3689	1.47	90.6638	90.5112	99.75	20.0695	0.9502
	A. Afuera	HD-S	237 (45,2)		30.8	6.9	869	350	0.282	0.7558	177.77	35.8054	1.28	87.379	87.0633	96.7149	6189.08	0.9998
	A. Afuera	UV	-		117.3	26.2
	Cabezo	LD-R	1298 (125)	2412.8	352.5	32.1	3220	1090	0.091	12.4896	613.78	41.8015	1.45	90.5338	93.2449	99.5495	50.0454	0.98
	Cabezo	MD-SR	507,9 (47,6)		267.6	24.4	3544	760	0.132	6.4222	662.09	49.5118	1.44	86.5204	88.2621	99.4075	235.307	0.9958
	Cabezo	HD-S	868,5 (127,8)		143.8	13.1	2097	690	0.146	0.8468	325.19	41.7706	1.36	87.7121	86.1696	96.3139	9514	0.9999
	Cabezo	UV	-		1648.9	68.3
	Chopas	LD-R	796,3 (102,8)	585.1	153.3	26.2	792	1940	0.052	19.9667	354.06	89.7444	1.38	93.3958	90.4373	99.7106	24.9474	0.9599
	Chopas	MD-SR	534,7 (95,7)		71.2	12.2	681	1050	0.096	6.4056	285.67	111.075	1.42	88.4718	86.4146	99.445	135.127	0.9926
	Chopas	HD-S	868,5 (127,8)		36.6	6.3	697	530	0.19	4.1714	173.04	74.5221	1.27	86.4558	87.5658	99.009	544.303	0.9982
	Chopas	UV	-		323.9	55.4
	I. Enmedio	LD-R	338,5 (183,1)	245.4	86.8	35.3	1590	550	0.183	19.7601	564.72	37.1513	1.35	92.2118	92.0135	99.2277	24.9576	0.9599
	I. Enmedio	MD-SR	400,7 (81,4)		70.3	28.7	958	730	0.136	14.2962	559.81	40.856	1.38	90.4665	90.2507	99.2267	45.8464	0.9782
	I. Enmedio	HD-S	368,6 (35,6)		42.2	17.2	652	650	0.154	8.744	389.26	36.6985	1.37	88.9621	88.6879	99.0361	125.33	0.992
	I. Enmedio	UV	-		46.2	18.8
	Rizo	LD-R	546,8 (98,9)	517.8	58.4	27.9	355	1600	0.06	10.4533	440.24	30.0864	1.35	92.3636	92.1217	99.1815	67.1136	0.9851
	Rizo	MD-SR	536,1 (56,2)		43.7	20.9	313	1400	0.07	14.7155	332.11	26.233	1.38	92.3369	92.0573	99.4507	45.5166	0.978
	Rizo	HD-S	517,7 (86,8)		5.4	2.6	115	500	0.21	0.4173	70.79	15.7949	1.23	87.1521	86.4018	94.6689	24615.9	1
	Rizo	UV	-		410.3	79.2
