# Supplementary material for: Landscape configuration in seagrass meadows and its influence on carbon stock in reef lagoon systems
Source: Frontiers journal article supplement (doi:10.3389/fmars.2024.1320194), 2025-03-19
Supplement: Table_4.docx [file Table_4.docx]

Supplementary Table 4. Accuracy of seagrass landscape maps. LD-R: Low density over rocks; MD-SR: Medium density over sand-rock; HD-S: High density over sand; UV: Unvegetated. OE: Omission Error; CE: Commission Error; K: Kappa index.

| **Region** | **Reef system** | **Landscape class** | **OE (%)** | **CE (%)** | **K (%)** |
| --- | --- | --- | --- | --- | --- |
| North | Gallega | MD-SR | 4.5 | 4.8 | 91 |
| HD-S | 3.7 | 4.5 |
| UV | 2.1 | 1.5 |
| Galleguilla | LD-R | 5.2 | 7.8 | 89 |
| MD-SR | 5.4 | 6.3 |
| HD-S | 3.9 | 3.5 |
| UV | 1.7 | 2.1 |
| Isla Pajaros | MD-SR | 4.2 | 4.0 | 93 |
| HD-S | 3.1 | 3.5 |
| UV | 2.7 | 2.1 |
| Isla Sacrificios | MD-SR | 5.8 | 4.7 | 92 |
| HD-S | 2.7 | 2.8 |
| UV | 1.9 | 2.6 |
| Isla Verde | LD-R | 4.6 | 5.7 | 89 |
| MD-SR | 5.7 | 6.3 |
| HD-S | 2.9 | 3.4 |
| UV | 1.9 | 2.4 |
| South | Anegada de Afuera | LD-R | 4.6 | 3.9 | 91 |
| MD-SR | 3.7 | 3.1 |
| HD-S | 2.8 | 3.4 |
| UV | 2.6 | 1.8 |
| Cabezo | LD-R | 3.6 | 4.1 | 93 |
| MD-SR | 2.9 | 3.5 |
| HD-S | 2.4 | 2.1 |
| UV | 2.0 | 1.8 |
| Chopas | LD-R | 3.1 | 2.4 | 94 |
| MD-SR | 2.9 | 3.1 |
| HD-S | 2.5 | 2.7 |
| UV | 1.4 | 1.6 |
| Isla de Enmedio | LD-R | 5.1 | 4.8 | 89 |
| MD-SR | 5.3 | 5.7 |
| HD-S | 4.8 | 4.6 |
| UV | 4.1 | 3.8 |
| Rizo | LD-R | 3.8 | 2.9 | 91 |
| MD-SR | 3.5 | 3.6 |
| HD-S | 3.1 | 4.1 |
| UV | 2.7 | 2.5 |
