# Supplementary material for: Landscape configuration in seagrass meadows and its influence on carbon stock in reef lagoon systems
Source: Frontiers journal article supplement (doi:10.3389/fmars.2024.1320194), 2025-03-19
Supplement: Table_5.docx [file Table_5.docx]

Supplementary table 5. Statistical summary and Bootstrap Bca confidence interval 95% (CI) of biomass organic carbon stock (BOC) and soils organic carbon stock (SOC) of the landscape class. LD-R: Low density over rocks; MD-SR: Medium density over sand-rock; HD-S: High density over sand. CLT: Core length total (cm); CF: Correction factor (%). n*=initial sample size. Carbon stock estimate to 0.25 m soil depth

| **Reef Lagoon** | **Landscape** | **Carbon stock (Mg C ha-1)** | **Mean** | **S.E.** | **n*** | **LI – LS**  **(95%)** | **CLT**  **(mean-SE)** | **CF** |
| --- | --- | --- | --- | --- | --- | --- | --- | --- |
|  | North region | | | | | | | |
| Gallega | MD-SR | BOC | 4.6 | 0.6 | 5 | 3.4 - 5.8 | - | - |
| HD-S | BOC | 5.2 | 0.8 | 4 | 3.7 - 6.9 | - | - |
| Galleguilla | LDR | BOC | 4.6 | 0.5 | 3 | 3.4 - 5.3 | - | - |
| MD-SR | BOC | 4.9 | 0.4 | 3 | 3.9 - 5.6 | - | - |
| HD-S | BOC | 4.2 | 0.5 | 5 | 3.2 - 5.3 | - | - |
| I. Pájaros | MD-SR | BOC | 3.7 | 0.4 | 13 | 2.9 - 4.6 | - | - |
| HD-S | BOC | 3.0 | 0.3 | 3 | 2.2 - 3.5 | - | - |
| I. Sacrificio | MD-SR | BOC | 3.5 | 0.5 | 9 | 2.5 - 4.7 | - | - |
| HD-S | BOC | 5.9 | 1.2 | 4 | 3.2 - 8.2 | - | - |
| I. Verde | LD-R | BOC | 1.2 | 0.2 | 4 | 0.8 - 1.7 | - | - |
| MD-SR | BOC | 2.5 | 0.7 | 8 | 1.2 – 4.0 | - | - |
| HD-S | BOC | 4.1 | 0.5 | 4 | 3.1 - 5.2 | - | - |
| Gallega | MD-SR | SOC | 45.5 | 7.1 | 6 | 32.2 - 59.4 | 21.8 – 2.4 | 0.93 |
| HD-S | SOC | 66.9 | 3.3 | 4 | 59.2 - 72.9 | 22.2 – 1.7 | 0.93 |
| Galleguilla | LD-R | SOC | 24.8 | 4.3 | 3 | 15.3 - 31.7 | 22.7 – 2.3 | 0.97 |
| MD-SR | SOC | 64.0 | 2.6 | 3 | 58.5 - 68.6 | 18.1 – 1.7 | 0.90 |
| HD-S | SOC | 70.4 | 5.4 | 4 | 58.6 - 79.5 | 19.2 – 1.7 | 0.85 |
| I. Pájaros | MD-SR | SOC | 62.0 | 4.9 | 11 | 52.6 - 71.7 | 19.6 – 2.2 | 0.96 |
| HD-S | SOC | 85.0 | 17.3 | 2 | 59.5 - 107.4 | 27 – 6.1 | 0.92 |
| I. Sacrificio | MD-SR | SOC | 55.4 | 3.2 | 8 | 48.5 - 61.1 | 20.7 – 1.7 | 0.88 |
| HD-S | SOC | 59.1 | 20.2 | 4 | 29.5 - 103.4 | 22.3 – 3.5 | 0.91 |
| I. Verde | LD-R | SOC | 86.1 | 6.7 | 3 | 72.2 - 97.6 | 29 – 5.5 | 0.85 |
| MD-SR | SOC | 74.5 | 10.4 | 4 | 53.9 - 93.4 | 27.3 – 4.5 | 0.89 |
| HD-S | SOC | 117.5 | 5.3 | 3 | 107.4 - 126.9 | 27.6 – 6.1 | 0.87 |
|  | South región | | | | | | | |
| A. Afuera | LD-R | BOC | 2.7 | 0.3 | 2 | 2.2 – 3.2 | - | - |
| MD-SR | BOC | 2.2 | 0.3 | 8 | 1.5 – 2.9 | - | - |
| HD-S | BOC | 3.4 | 0.9 | 5 | 1.6 – 5.3 | - | - |
| Cabezo | LD-R | BOC | 1.9 | 0.6 | 3 | 0.7 – 2.9 | - | - |
| MD-SR | BOC | 3.1 | 0.3 | 10 | 2.5 – 3.7 | - | - |
| HD-S | BOC | 2.9 | 0.1 | 11 | 2.5 – 3.2 | - | - |
| Chopas | LD-R | BOC | 1.3 | 0.3 | 10 | 0.8 – 2.0 | - | - |
| MD-SR | BOC | 2.1 | 0.3 | 7 | 1.4 – 2.7 | - | - |
| HD-S | BOC | 2.4 | 0.4 | 4 | 1.3 – 3.1 | - | - |
| I. En medio | LD-R | BOC | 1.9 | 0.2 | 4 | 1.4 – 2.4 | - | - |
| MD-SR | BOC | 2.1 | 0.7 | 4 | 0.9 – 3.7 | - | - |
| HD-S | BOC | 3.1 | 0.2 | 4 | 2.5 – 3.6 | - | - |
| Rizo | LD-R | BOC | 0.7 | 0.1 | 6 | 0.5 – 0.9 | - | - |
| MD-SR | BOC | 0.9 | 0.1 | 7 | 0.5 – 1.2 | - | - |
| HD-S | BOC | 2.3 | 0.6 | 3 | 0.7 – 3.2 | - | - |
| A. Afuera | LD-R | SOC | 29.7 | 0.8 | 2 | 28.5 – 30.7 | 19.9 – 0.5 | 0.95 |
| MD-SR | SOC | 42.5 | 5.4 | 7 | 31.9 – 52.6 | 18.4 – 1.5 | 0.88 |
| HD-S | SOC | 103.6 | 2.0 | 7 | 99.6 – 107.8 | 36.9 – 3.1 | 0.82 |
| Cabezo | LD-R | SOC | 67.0 | 6.3 | 5 | 55.0 – 79.3 | 21.3 – 1.6 | 0.93 |
| MD-SR | SOC | 80.3 | 4.9 | 10 | 70.1 – 89.9 | 23.6 – 1.4 | 0.95 |
| HD-S | SOC | 98.1 | 8.6 | 15 | 81.4 – 115.6 | 25.7 – 1.6 | 0.90 |
| Chopas | LD-R | SOC | 44.7 | 7.9 | 7 | 30.2 – 60.5 | 21.3 – 1.7 | 0.91 |
| MD-SR | SOC | 60.9 | 23.9 | 3 | 19.4 – 101.3 | 18.4 – 3.4 | 0.91 |
| HD-S | SOC | 78.7 | 11.2 | 3 | 53.2 – 95.4 | 20.3 – 1.6 | 0.92 |
| I. En medio | LD-R | SOC | 33.7 | 2.0 | 3 | 29.9 – 36.9 | 23.4 – 0.2 | 0.83 |
| MD-SR | SOC | 76.5 | 10.0 | 4 | 57.3 – 96.4 | 27 – 2.8 | 0.90 |
| HD-S | SOC | 77.3 | 6.6 | 7 | 67.1 – 91.9 | 21.2 – 2.3 | 0.89 |
| Rizo | LD-R | SOC | 19.1 | 4.5 | 3 | 13.5 – 26.0 | 17.6 – 1.2 | 0.84 |
| MD-SR | SOC | 62.3 | 12.6 | 2 | 45.2 – 78.3 | 18.1 – 5.6 | 0.82 |
| HD-S | SOC | 41.8 | 9.5 | 2 | 28.4 – 54.4 | 22.8 – 6.7 | 0.86 |
